CORRECTION

# Correction: Differential Effects of Conservation Management on SOC Accumulation in the Grasslands of China

The *PLOS ONE* Staff

In the Funding section, the grant number from the funder National Basic Research Program of China is listed incorrectly. The correct grant number is: 2014CB954004. The publisher apologizes for the error.

## Reference

1. Zhang P, Tang J, Sun W, Yu Y, Zhang W (2015) Differential Effects of Conservation Management on SOC Accumulation in the Grasslands of China. *PLoS ONE* 10(9): e0137280. doi: [10.1371/journal.pone.0137280](https://doi.org/10.1371/journal.pone.0137280) PMID: [26356845](https://pubmed.ncbi.nlm.nih.gov/26356845/)

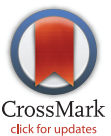

## OPEN ACCESS

**Citation:** The *PLOS ONE* Staff (2015) Correction: Differential Effects of Conservation Management on SOC Accumulation in the Grasslands of China. *PLoS ONE* 10(12): e0145590. doi:10.1371/journal.pone.0145590

**Published:** December 17, 2015

**Copyright:** © 2015 The PLOS ONE Staff. This is an open access article distributed under the terms of the [Creative Commons Attribution License](https://creativecommons.org/licenses/by/4.0/), which permits unrestricted use, distribution, and reproduction in any medium, provided the original author and source are credited.
